# Supplementary material for: Bio-Inspired Fiber Reinforcement for Aortic Valves: Scaffold Production Process and Characterization
Source: MDPI journal article supplement (doi:10.3390/bioengineering10091064), 2023-09-09
Supplement: s1 [file s1]

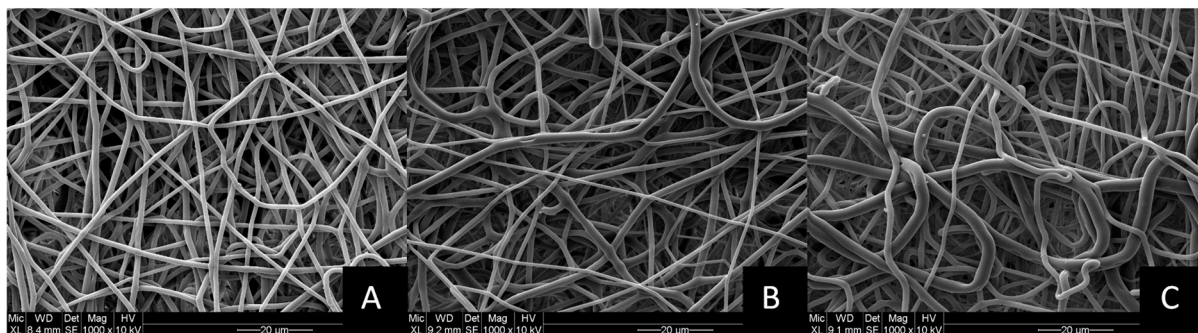

Sup. Figure S1. Effect of voltage on the e-spun fiber mat PCU concentration: 8 wt %; Distance to collector: 10 cm; A: 24 kV Fiber diameter  $1.17 \pm 0.49$ , pore size  $5.31 \pm 0.10$ ; B: 26 kV fiber diameter  $1.41 \pm 0.54$ , pore size:  $4.64 \pm 0.48$ ; C: 28 kV fiber diameter  $1.62 \pm 0.60$ , pore size:  $4.73 \pm 0.29$ ; Fiber diameter and pore size are measured in [ $\mu\text{m}$ ]

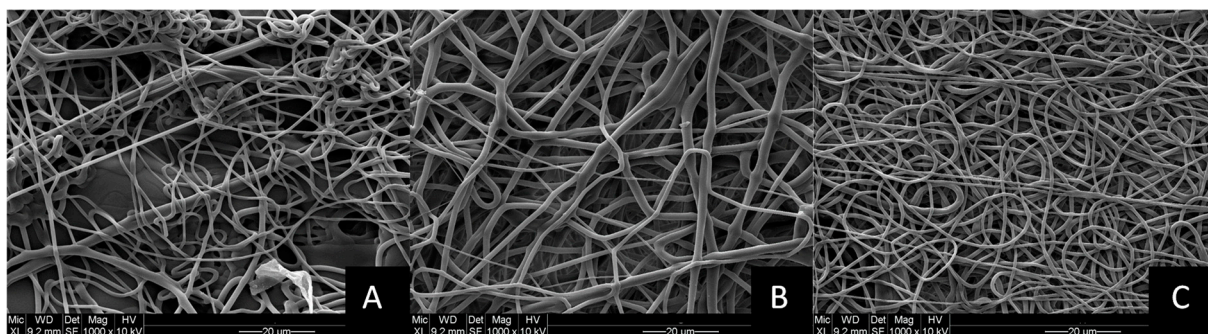

Sup. Figure S2. Effect of distance to collector on the e-spun fiber mat PCU concentration: 8 wt %; Voltage: 26 kV; A: 5 cm, Fiber diameter  $1.76 \pm 0.85$ , pore size  $4.07 \pm 0.59$ ; B: 10 cm, fiber diameter  $1.41 \pm 0.54$ , pore size:  $4.64 \pm 0.48$ ; C: 15 cm, fiber diameter  $0.99 \pm 0.32$ , pore size:  $3.48 \pm 0.24$ ; Fiber diameter and pore size are measured in [ $\mu\text{m}$ ]

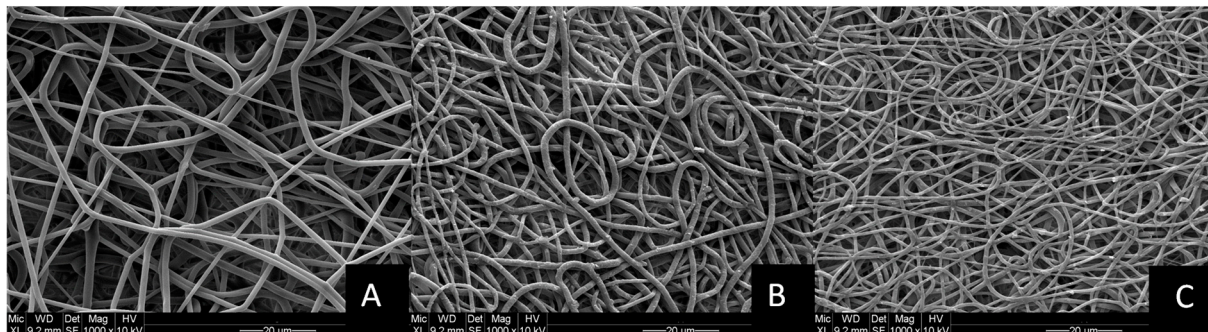

Sup. Figure S3. Effect of PCU concentration on the e-spun fiber mat distance to collector: 10 cm; Voltage: 26 kV; A: 8 wt%, Fiber diameter  $1.50 \pm 0.44$ , pore size  $4.50 \pm 0.37$ ; B: 10 wt %, fiber diameter  $1.47 \pm 0.55$ , pore size:  $3.86 \pm 0.51$ ; C: 12 wt%, fiber diameter  $0.97 \pm 0.35$ , pore size:  $3.15 \pm 0.06$ ; Fiber diameter and pore size are measured in [ $\mu\text{m}$ ]
